# Supplementary material
Source: Springer Nature journal article supplement (https://www.springermedizin.de/resource/supplementary/12962_2009_114_MOESM1_ESM.pdf/9572186)
Supplement: MOESM1 [file 9572186]

## Total costs of *Shushastha*

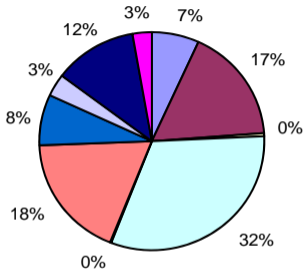

- Space rent
- Capital items (annualized)
- Supervision
- Personnel
- Training
- Drug
- Non-drug medical
- Non-drug non-medical
- Operational costs
- Pathology (recurrent)
